# Supplementary material for: Source influence on emission pathways and ambient PM 2.5 pollution over India (2015–2050)
Source: Copernicus journal article supplement (doi:10.5194/acp-2017-1114), 2017-12-13
Supplement: Supplementary file 1 [file acp-2017-1114-supplement.pdf]

## SUPPLEMENTARY MATERIAL

### Source influence on emission pathways and ambient PM<sub>2.5</sub> pollution over India (2015-2050)

Chandra Venkataraman<sup>1,3</sup>, Michael Brauer<sup>2</sup>, Kushal Tibrewal<sup>3</sup>, Pankaj Sadavarte<sup>3,4</sup>, Qiao Ma<sup>5</sup>, Aaron Cohen<sup>6</sup>, Sreelekha Chaliyakunnel<sup>7</sup>, Joseph Frostad<sup>8</sup>, Zbigniew Klimont<sup>9</sup>, Randall V. Martin<sup>10</sup>, Dylan B. Millet<sup>7</sup>, Sajeed Philip<sup>10,11</sup>, Katherine Walker<sup>6</sup>, Shuxiao Wang<sup>5,12</sup>

<sup>1</sup>Department of Chemical Engineering, Indian Institute of Technology Bombay, Powai, Mumbai, India

<sup>2</sup>School of Population and Public Health, The University of British Columbia, Vancouver, British Columbia V6T1Z3, Canada

<sup>3</sup>Interdisciplinary program in Climate Studies, Indian Institute of Technology Bombay, Powai, Mumbai, India

<sup>4</sup>Institute for Advanced Sustainability Studies (IASS), Berliner Str. 130, 14467 Potsdam, Germany

<sup>5</sup>State Key Joint Laboratory of Environment Simulation and Pollution Control, School of Environment, Tsinghua University, Beijing 100084, China

<sup>6</sup>Health Effects Institute, Boston, MA 02110, USA

<sup>7</sup>Department of Soil, Water, and Climate, University of Minnesota, Minneapolis–Saint Paul, MN 55108, USA

<sup>8</sup>Institute for Health Metrics and Evaluation, University of Washington, Seattle, WA 98195, USA

<sup>9</sup>International Institute for Applied Systems Analysis, Laxenburg, Austria

<sup>10</sup>Department of Physics and Atmospheric Science, Dalhousie University, Halifax, Nova Scotia B3H 4R2, Canada

<sup>11</sup>NASA Ames Research Center, Moffett Field, California, USA

<sup>12</sup>State Environmental Protection Key Laboratory of Sources and Control of Air Pollution Complex, Beijing 100084, China

*Correspondence to:* Chandra Venkataraman ([chandra@iitb.ac.in](mailto:chandra@iitb.ac.in))

## List of Figures:

|                                                                                                                                                     |    |
|-----------------------------------------------------------------------------------------------------------------------------------------------------|----|
| <b>Figure S1.</b> Methodology for estimation of future sectoral activity, apportionment to technology mix and related scenario based emissions..... | 5  |
| <b>Figure S2.</b> Sectoral Growth between 2015- 2050. Growth rates were computed based on analysis of existing data and reviewed literature. ....   | 6  |
| <b>Figure S3.</b> Energy Evolution in Scenarios BAU, S2 and S3.....                                                                                 | 12 |
| <b>Figure S4.</b> Percentage deviation in emissions of ECLIPSE V5a and GAINS-WEO2016 from emissions of this study by sector.....                    | 16 |

## List of Tables:

|                                                                                                                           |    |
|---------------------------------------------------------------------------------------------------------------------------|----|
| <b>Table S1.</b> Emissions for 2015 by state (MT/yr) .....                                                                | 3  |
| <b>Table S2.</b> Uncertainty Bounds (95% Confidence Levels) for Indian Emissions of Individual Pollutants by Sector ..... | 4  |
| <b>Table S3.</b> Sectoral growth rates for 2015-2030 and 2030-2050.....                                                   | 6  |
| <b>Table S4.</b> Technology fraction for major emissions emitting sectors .....                                           | 8  |
| <b>Table S5.</b> Specific energy per unit activity for each technology (PJ/activity) .....                                | 10 |
| <b>Table S6.</b> Energy demand for each technology (EJ/year) .....                                                        | 12 |
| <b>Table S7.</b> Emission factors of SLCP's, fine particulate matter and CO <sub>2</sub> (g/kg of fuel used) .....        | 14 |
| <b>Table S8.</b> Representative Concentration Pathways (RCP) scenarios values over India.....                             | 18 |

**S1. Present day emissions at state-level and sectoral uncertainties in emissions****Table S1.** Emissions for 2015 by state (MT/yr)

| <b>States</b>        | <b>PM2.5</b> | <b>BC</b>    | <b>OC</b>    | <b>SO2</b>   | <b>NOX</b>   | <b>NMVOC</b>  |
|----------------------|--------------|--------------|--------------|--------------|--------------|---------------|
| Andaman and Nicobar  | 0.124        | 0.001        | 0.003        | 0.426        | 0.460        | 0.032         |
| Arunachal Pradesh    | 0.006        | 0.001        | 0.002        | 0.000        | 0.002        | 0.010         |
| Assam                | 0.144        | 0.031        | 0.048        | 0.067        | 0.096        | 0.266         |
| Bihar                | 0.747        | 0.117        | 0.245        | 0.331        | 0.338        | 1.754         |
| Chandigarh           | 0.067        | 0.012        | 0.029        | 0.008        | 0.011        | 0.122         |
| Chhattisgarh         | 0.327        | 0.020        | 0.024        | 0.643        | 0.704        | 0.124         |
| Dadra & Nagar Haveli | 0.002        | 0.000        | 0.000        | 0.003        | 0.003        | 0.006         |
| Diu and Daman        | 0.001        | 0.000        | 0.000        | 0.000        | 0.002        | 0.002         |
| Goa                  | 0.008        | 0.002        | 0.001        | 0.009        | 0.011        | 0.013         |
| Gujarat              | 0.505        | 0.073        | 0.089        | 0.904        | 0.701        | 0.881         |
| Haryana              | 0.305        | 0.041        | 0.084        | 0.216        | 0.322        | 0.530         |
| Himachal Pradesh     | 0.030        | 0.007        | 0.009        | 0.004        | 0.023        | 0.048         |
| Jammu and Kashmir    | 0.058        | 0.011        | 0.019        | 0.007        | 0.026        | 0.101         |
| Jharkhand            | 0.230        | 0.043        | 0.069        | 0.186        | 0.181        | 0.404         |
| Karnataka            | 0.439        | 0.065        | 0.109        | 0.338        | 0.432        | 0.702         |
| Kerala               | 0.142        | 0.029        | 0.034        | 0.107        | 0.133        | 0.271         |
| Lakshadweep          | 0.002        | 0.001        | 0.001        | 0.000        | 0.004        | 0.005         |
| Madhya pradesh       | 0.498        | 0.074        | 0.107        | 0.532        | 0.678        | 0.706         |
| Maharashtra          | 0.437        | 0.070        | 0.073        | 0.570        | 0.709        | 0.917         |
| Manipur              | 0.013        | 0.003        | 0.005        | 0.001        | 0.022        | 0.023         |
| Meghalaya            | 0.009        | 0.002        | 0.002        | 0.002        | 0.008        | 0.010         |
| Mizoram              | 0.195        | 0.029        | 0.082        | 0.011        | 0.022        | 0.372         |
| Nagaland             | 0.017        | 0.003        | 0.004        | 0.002        | 0.014        | 0.027         |
| NCT Delhi            | 0.060        | 0.011        | 0.009        | 0.057        | 0.097        | 0.132         |
| Orissa               | 0.372        | 0.050        | 0.077        | 0.489        | 0.319        | 0.472         |
| Puducherry           | 0.004        | 0.001        | 0.001        | 0.003        | 0.006        | 0.008         |
| Punjab               | 0.450        | 0.050        | 0.133        | 0.189        | 0.405        | 0.768         |
| Rajasthan            | 0.515        | 0.078        | 0.131        | 0.680        | 0.536        | 0.681         |
| Seemandhra           | 0.323        | 0.051        | 0.082        | 0.220        | 0.265        | 0.572         |
| Sikkim               | 0.003        | 0.001        | 0.001        | 0.000        | 0.001        | 0.004         |
| Tamilnadu            | 0.441        | 0.065        | 0.089        | 0.461        | 0.576        | 0.685         |
| Telangana            | 0.232        | 0.036        | 0.059        | 0.158        | 0.190        | 0.410         |
| Tripura              | 0.019        | 0.003        | 0.007        | 0.001        | 0.008        | 0.033         |
| Uttar pradesh        | 1.676        | 0.231        | 0.508        | 0.915        | 1.510        | 3.579         |
| Uttarakhand          | 0.043        | 0.010        | 0.014        | 0.006        | 0.048        | 0.090         |
| West Bengal          | 0.656        | 0.098        | 0.186        | 0.544        | 0.637        | 1.078         |
| <b>India</b>         | <b>9.101</b> | <b>1.320</b> | <b>2.337</b> | <b>8.091</b> | <b>9.498</b> | <b>15.839</b> |

**Table S2.** Uncertainty Bounds (95% Confidence Levels) for Indian Emissions of Individual Pollutants by Sector

| <b>Sector</b>          | <b>NO<sub>x</sub></b> | <b>SO<sub>2</sub></b> | <b>PM<sub>2.5</sub></b> | <b>NMVOC</b>        |
|------------------------|-----------------------|-----------------------|-------------------------|---------------------|
| Industry               | [-85%, +256%]         | [-22%, +26%]          | [-81%, +217%]           | [-80%, +209%]       |
| Transport              | [-63%, +122%]         | [-71%, +157%]         | [-54%, +91%]            | [-59%, +107%]       |
| Residential            | --                    | [-59%, +107%]         | [-61%, +113%]           | [-66%, +133%]       |
| Agricultural           | [-60%, +111%]         | [-58%, +105%]         | [-46%, +70%]            | [-63%, +121%]       |
| Informal industry      | [-85%, +260%]         | [-10%, +11%]          | [-74%, +173%]           | [-79%, +204%]       |
| <b>Total Emissions</b> | <b>[-65%, +125%]</b>  | <b>[-20%, +24%]</b>   | <b>[-49%, +78%]</b>     | <b>[-44%, +66%]</b> |

## S2. Future emission pathways

### S2.1. Methodology

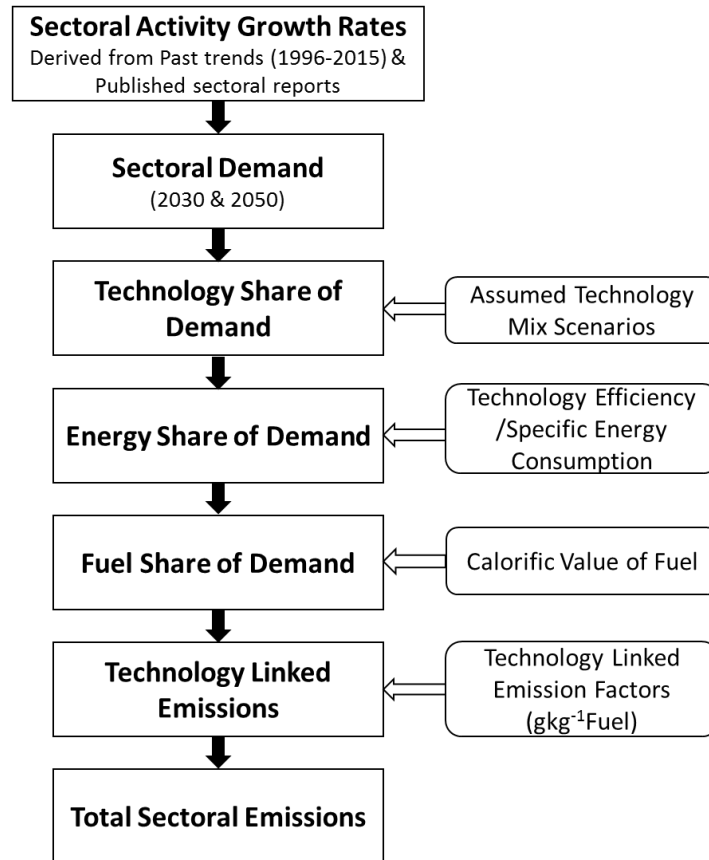

**Figure S1.** Methodology for estimation of future sectoral activity, apportionment to technology mix and related scenario based emissions.

## S2.2. Evolution of sectoral demand

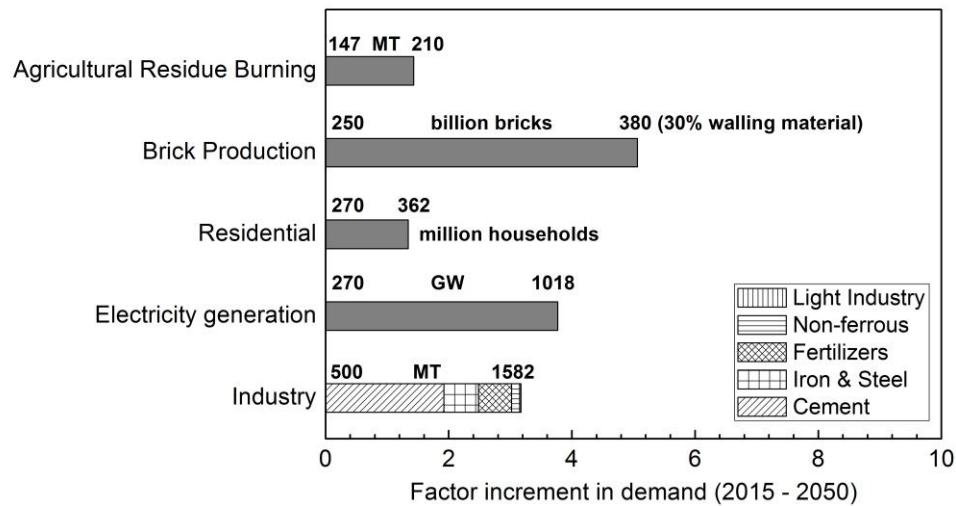

**Figure S2.** Sectoral Growth between 2015- 2050. Growth rates were computed based on analysis of existing data and reviewed literature.

**Table S3.** Sectoral growth rates for 2015-2030 and 2030-2050

| Sectors                | Activity Name                                                  | Activity | Growth rates in % per year      |                               |                         |             |                               |                       |             |
|------------------------|----------------------------------------------------------------|----------|---------------------------------|-------------------------------|-------------------------|-------------|-------------------------------|-----------------------|-------------|
|                        |                                                                |          | 2015                            | 2015 - 2030                   |                         |             | 2030 - 2050                   |                       |             |
|                        |                                                                |          | Growth rate from 2000-2015 data | IESS <sup>a</sup> Growth Rate | Published growth rate   | This Study  | IESS <sup>a</sup> Growth Rate | Published growth rate | This Study  |
| Electricity generation | Installed capacity (GW)                                        | 270      | 6.89                            | 6.31                          | 6.7 <sup>b</sup>        | <b>6.63</b> | 1.84                          | NIL                   | <b>1.84</b> |
| Industry               | Production (MT)                                                |          |                                 |                               |                         |             |                               |                       |             |
|                        | Cement                                                         | 215      | 5.06                            | 5.63                          | 7.08 <sup>c</sup>       | <b>6.07</b> | 2.86                          | NIL                   | <b>3.1</b>  |
|                        | Iron and steel                                                 | 88       | 4.49                            | 8.03                          | 3.26 <sup>d</sup>       | <b>4.5</b>  | 2.93                          | NIL                   | <b>2.5</b>  |
|                        | Fertilizer                                                     | 190      | 1.77                            | 1.04                          | 2.86 <sup>e</sup>       | <b>2.32</b> | 0.02                          | NIL                   | <b>0.04</b> |
|                        | Non-ferrous                                                    | 4        | 6.65                            | 9.74                          | 11.3 <sup>f</sup>       | <b>11.3</b> | 6.77                          | NIL                   | <b>6.23</b> |
| Brick production       | Number of bricks (in billion) (similar to construction growth) | 250      | NIL                             | NIL                           | 6.6 <sup>g</sup>        | <b>6.6</b>  | NIL                           | NIL                   | <b>3.37</b> |
| Transport              | Passenger-kilometre (in billion)                               | 9997     | 6.54 <sup>*</sup>               | 5.02                          | NIL                     | <b>5.78</b> | 2.42                          | NIL                   | <b>2.89</b> |
|                        | Freight-kilometre (in billion)                                 | 2564     | 3.61                            | -                             | NIL                     | <b>3.61</b> | -                             | NIL                   | <b>1.8</b>  |
| Residential            | Household number (in million) (similar to population growth)   | 270      | 1.39                            | 1.88                          | 1.1 <sup>h</sup>        | <b>1.25</b> | 1.57                          | 0.47 <sup>h</sup>     | <b>0.53</b> |
| Agriculture            | Crop production (KT)                                           | 578      | 1.02                            | NIL                           | ~ 1 to 1.1 <sup>i</sup> | <b>1.02</b> | NIL                           | NIL                   | <b>1.02</b> |

|  |                        |  |  |  |  |  |  |  |  |
|--|------------------------|--|--|--|--|--|--|--|--|
|  | (i.e. cereal produced) |  |  |  |  |  |  |  |  |
|--|------------------------|--|--|--|--|--|--|--|--|

\* Growth rate calculated for data from 1996 - 2015

Sources: [Short forms in brackets]

- a) India Energy Security Scenarios 2047, NITI Aayog, Govt. of India, 2015 [NITI Aayog 2015]
- b) Data from the Ministry of Environment, Forest and Climate Change (MoEFCC) analysed by the Prayas Energy Group, 2011 [MoEFCC, 2011]
- c) International Energy Agency, 2009 [IEA, 2009]
- d) Dr.A.S.Firoz, Economic Research Unit, 2014 [Firoz, 2014]
- e) Industry Group for Petroleum & Natural Gas Regulatory Board, 2013 [PNGRB, 2013]
- f) Prof. K.S.S. Murthy, Gen. Secretary, Aluminium Association of India, 2014 [Murthy, 2014]
- g) Maithel et al., Study report prepared by Green Knowledge Solutions, New Delhi, 2012 [Maithel et al., 2012]
- h) Shukla, P. R., et al. "Low Carbon Society Vision 2050. India. Indian Institute of Management Ahmedabad." National Institute for Environmental Studies, Kyoto University and Mizuho Information & Research Institute, 2009 [Shukla et al., 2009]
- i) Ray, D.K., Mueller, N.D., West, P.C. and Foley, J.A., 2013. Yield trends are insufficient to double global crop production by 2050. PloS one, 8(6), p.e66428. [Ray et al., 2013]

## S2.3 Evolution of technology mix

In 2015, power generation was almost entirely from subcritical pressure thermal power plants with an average gross efficiency of 30.5% (IEP, 2006; IEES, NITI Aayog 2015). A switch to more efficient technologies such as supercritical (SC), ultra-supercritical (USC), and integrated gasification combined cycle (IGCC) is expected in future. For 2030 and 2050, respectively, the non-fossil shares were assumed to be 30% and 40% in BAU, 40% and 60% in S2, and 75% and 80% in S3. The assumed technology mix in S2 follows the NDC's proposed non-fossil share of 2030. In S3, it is consistent with high efficiency-low carbon growth cases in earlier studies (Anandarajah and Gambhir 2014; Shukla and Chaturvedi 2012; Level 4, IEES, Niti Aayog, 2015). The transition of thermal power plants sub-critical boiler technology to more efficient technologies like super-critical, ultra-super-critical and integrated gasification combined cycle (IGCC) is based on published scenarios (IEP, 2006; IEES, Niti Aayog, 2015).

In the transport sector, current technology shares are 81% private vehicles (two-wheeler, three-wheeler and cars) and 19% public vehicles (buses and taxis) (Pandey and Venkataraman, 2014). The share of private vehicles is projected to increase in a business as usual scenario till 2030, especially for two-wheelers and cars (NTDPC, 2013; Guttikunda and Mohan, 2014). However, beyond 2030, as GDP stabilizes, no further increase in private vehicle share is assumed, with a greater demand for public transport. Therefore, in the S2 scenario, private vehicle share is assumed as 75% and 70% in 2030 and 2050, respectively. For S3 private vehicle share is assumed to decrease rapidly to 60% in 2030 and 40% in 2050 in consistent with Level 2 of IEES (NITI Aayog, 2015) (Table S4). For future emissions, Auto Fuel Policy (Auto Fuel Policy Vision 2025, 2014) recommendations were applied, wherein 2/3-wheelers were proposed to have Bharat Stage (BS)-IV standards from 1st April 2015, light and heavy duty diesel vehicles to have BS-Va and BS-Vb. There is a recent proposal to leapfrog directly to BS-VI for all on-road vehicle categories by 2020 (MoRTH, 2016). However, scenarios used here, do not reflect such a quick change, keeping the share of BS-VI at modest levels owing to expected delays in availability of BS-VI compliant fuels and/or difficulties in making the technologies adaptive to Indian road conditions as well as cost-effective (ICRA, 2016), along with the use of non-BS-VI compliant vehicles in peri-urban and rural areas. In the transport sector, engine efficiency improvements are not foreseen to have significant increases across technologies (e.g. across BS-III to BS-VI) as these standards primarily govern the control of emissions of air pollutants. Until 2015 there were no fuel economy standards for India. However, energy efficiency improvement are assumed over the years in the S3 scenario keeping in mind the recently proposed fuel economy targets (MoP, 2015)

In the brick sector, currently 76% of total bricks are produced by Bull's trench kilns (BTK) and 21% by clamp kilns. Clamp kilns are highly polluting, with sun-dried bricks, stacked alternately with layers of powdered fuel, allowed to smolder until the bricks are baked. The demand for non-fired-brick walling materials is currently negligible, but expected to rise (10-25% in BAU, 30-45% in S2 and 40-75% in S3 for 2030-2050), from increased availability of hollow-block technology and the governmental incentives for fly-ash bricks (UNDP, 2009). For fired bricks, cleaner technologies include a retrofit to existing Bull's

trench kilns, called zig-zag firing, or significantly more capital intensive, vertical shaft brick kilns (VSBK) which have increased efficiency. For small clamp kilns, it is believed that regulation may not be effective, so a constant activity level, but a decreasing share was assumed in future, with new cleaner technologies filling growing demand (personal communication, Maithel, 2015).

Evolution of technologies in informal industry from say traditional wood furnaces, presently supplying all energy requirements, to gasifier and LPG based technologies is assumed to increase in 2030 and 2050 respectively, to 20% and 35% in S2 and 65% and 80% in S3 (Table S4).

India's rural population largely depends on biomass fuels for cooking and lighting (Venkataraman et al. 2010). Although India has introduced improved biomass cook-stoves to improve fuel efficiency and to reduce smoke exposure using chimneys or combustion improvements, further technological improvements or alternatives are required to reach LPG-like emission levels to reduce disease risk due to household biomass burning. The BAU scenario assumes an increasing penetration rate of liquefied petroleum gas (LPG) and piped natural gas (PNG) typical of 1995–2015 (Pandey et al. 2014). In the S2 and S3 scenarios, assumed future switch in residential energy to use of LPG/PNG or low-emission biomass gasifier stoves and biogas, is consistent with energy efficiency increases proposed in Levels 2 and 4 of the IESS (NITI Aayog 2015). We use lower rates of clean technology adoption in the residential sector in both the BAU and S2 scenarios, because no current legislation or standards target this sector, but a complete switch away from traditional biomass fuels in S3. In case of lighting, 37% usage is of highly polluting kerosene wick lamps and lanterns, which emit large amounts of black carbon (Lam et al. 2012), while the balance is of electricity, with less than 1% solar lamps. Residential lighting is assumed to shift from a modest present-day dependence on kerosene to a complete switch to electricity and solar lamps in 2030 and 2050 (National Solar Mission 2010), a change expected with a national promotion of renewable energy.

In the agricultural sector it is assumed, based on satellite active fire cycles in agricultural land-use areas (Venkataraman et al., 2006), that residues of cereal and sugarcane are burned in field. Gupta (2014) indicated greater mechanization of agriculture, with decrease in amounts of residue, but increase in incidence of field burning, needed to clear the rubble consisting of 6-12 inch stalks, before sowing. Mulching technology was reported to allow sowing even through rubble and loosely spread residue, thus avoiding burning for field clearing. The present work applies different levels of mulching, replacing field burning, in future years (Table S4).

**Table S4.** Technology fraction for major emissions emitting sectors

| Sector         | Source Categories | TechMix              |      | BAU  |      | S2   |      | S3   |      |
|----------------|-------------------|----------------------|------|------|------|------|------|------|------|
|                |                   |                      | 2015 | 2030 | 2050 | 2030 | 2050 | 2030 | 2050 |
| Thermal power  | Thermal power     | Fossil-fuel energy   | 0.70 | 0.70 | 0.60 | 0.60 | 0.40 | 0.25 | 0.2  |
|                |                   | Coal fraction        | 0.61 | 0.59 | 0.48 | 0.48 | 0.24 | 0.20 | 0.12 |
|                |                   | Gas fraction         | 0.09 | 0.11 | 0.12 | 0.12 | 0.16 | 0.05 | 0.08 |
|                |                   | Non-carbon energy    | 0.30 | 0.30 | 0.40 | 0.40 | 0.60 | 0.75 | 0.80 |
|                |                   | Sub-critical         | 1.00 | 0.90 | 0.70 | 0.65 | 0.55 | 0.40 | 0.30 |
|                |                   | Super-critical       | 0.00 | 0.10 | 0.15 | 0.15 | 0.20 | 0.15 | 0.15 |
|                |                   | Ultra super critical | 0.00 | 0.00 | 0.10 | 0.12 | 0.15 | 0.20 | 0.20 |
|                | IGCC              | 0.00                 | 0.00 | 0.05 | 0.08 | 0.10 | 0.25 | 0.35 |      |
| Heavy Industry | Cement            | PAT                  | 0.72 | 0.72 | 0.72 | 0.77 | 0.83 | 0.90 | 1.00 |
|                |                   | Non-PAT              | 0.28 | 0.28 | 0.28 | 0.23 | 0.17 | 0.10 | 0.00 |
|                | Iron and steel    | PAT                  | 0.56 | 0.58 | 0.60 | 0.62 | 0.69 | 0.85 | 1.00 |
|                |                   | Non-PAT              | 0.44 | 0.42 | 0.40 | 0.38 | 0.31 | 0.15 | 0.00 |
|                | Fertilizer        | PAT                  | 0.75 | 0.75 | 0.75 | 0.79 | 0.84 | 0.95 | 1.00 |
|                |                   | Non-PAT              | 0.25 | 0.25 | 0.25 | 0.21 | 0.16 | 0.05 | 0.00 |
|                | Non-ferrous       | PAT                  | 0.69 | 0.69 | 0.70 | 0.76 | 0.83 | 0.90 | 1.00 |
|                | Non-PAT           | 0.31                 | 0.31 | 0.30 | 0.24 | 0.17 | 0.10 | 0.00 |      |



[illegible]

## S2.4. Evolution of specific energy and total energy consumption

Different technologies are matched with corresponding specific energy per unit activity (Table S5), related to each technology type. In technology evolution, a given technology may improve in efficiency with time or may be replaced with higher efficiency- lower emissions technology at greater rates with time. Both these possibilities are captured in the assumptions, with no efficiency improvement with time characterizing BAU, but with increasing efficiency improvements with time (in 2030 and 2050) characterizing S2 and S3 scenarios (Table S5). Thus in scenarios with high-efficiency energy technologies, there is a reduction of total energy consumption despite increase in activity.

In thermal power sector, the shift in energy efficiency is seen across the technologies from sub-critical plants being the least efficient to plants using integrated gasified combined cycle having the highest efficiency. Under BAU scenario, the individual technologies are not assumed to undergo any improvement in their energy utilization. For S2 and S3, each technology is assumed to have better energy efficiency by 10% in 2030 and 15% in 2050. This evolution of energy efficiency in power plants is governed by the Perform, Achieve and Trade (PAT) scheme. To nurture energy efficiency in industries, Bureau of Energy Efficiency (BEE) under Ministry of Power launched the 'Perform, Achieve and Trade' (PAT) scheme under the National Mission on Enhanced Energy Efficiency (NMEEE) since July, 2012 (MoP, 2012; IESS, NITI Aayog, 2015). Under this scheme, every industry (includes power plants and heavy industries, referred to as “designated consumers” in the scheme) must meet a certain energy efficiency target by implementing appropriate and timely technological reforms. Thus, for industries also, the specific energy per unit activity is representative of the level of penetration of the PAT scheme across different industries over time under each scenario.

**Table S5.** Specific energy per unit activity for each technology (PJ/activity)

| Sector                      | Source Categories | TechMix                   | Acitivity<br>(units) | 2015   | BAU    |        | S2     |        | S3     |        |
|-----------------------------|-------------------|---------------------------|----------------------|--------|--------|--------|--------|--------|--------|--------|
|                             |                   |                           |                      |        | 2030   | 2050   | 2030   | 2050   | 2030   | 2050   |
| Thermal power               | Thermal power     | Sub-critical-coal         | GW                   | 68.24  | 68.24  | 68.24  | 61.41  | 58.00  | 61.41  | 58.00  |
|                             |                   | Super-critical-coal       | GW                   | 60.79  | 60.79  | 60.79  | 54.71  | 51.67  | 54.71  | 51.67  |
|                             |                   | Ultra super critical-coal | GW                   | 54.05  | 54.05  | 54.05  | 48.65  | 45.94  | 48.65  | 45.94  |
|                             |                   | IGCC-coal                 | GW                   | 52.01  | 52.01  | 52.01  | 46.81  | 44.21  | 46.81  | 44.21  |
|                             |                   | Sub-critical-gas          | GW                   | 39.00  | 39.00  | 39.00  | 35.10  | 33.15  | 35.10  | 33.15  |
|                             |                   | Super-critical-gas        | GW                   | 34.75  | 34.75  | 34.75  | 31.27  | 29.53  | 31.27  | 29.53  |
|                             |                   | Ultra super critical-gas  | GW                   | 30.89  | 30.89  | 30.89  | 27.81  | 26.26  | 27.81  | 26.26  |
|                             |                   | IGCC-gas                  | GW                   | 29.73  | 29.73  | 29.73  | 26.75  | 25.27  | 26.75  | 25.27  |
| Heavy Industry              | Cement            | PAT                       | Million Ton          | 4.47   | 4.47   | 4.47   | 4.02   | 3.80   | 4.02   | 3.80   |
|                             |                   | Non-PAT                   | Million Ton          | 4.56   | 4.56   | 4.56   | 4.10   | 3.88   | 4.10   | 3.88   |
|                             | Iron and steel    | PAT                       | Million Ton          | 25.62  | 25.62  | 25.62  | 23.06  | 21.78  | 23.06  | 21.78  |
|                             |                   | Non-PAT                   | Million Ton          | 34.83  | 34.83  | 34.83  | 31.35  | 29.61  | 31.35  | 29.61  |
|                             | Fertilizer        | PAT                       | Million Ton          | 1.30   | 1.30   | 1.30   | 1.17   | 1.10   | 1.17   | 1.10   |
|                             |                   | Non-PAT                   | Million Ton          | 1.39   | 1.39   | 1.39   | 1.25   | 1.18   | 1.25   | 1.18   |
|                             | Non-ferrous       | PAT                       | Million Ton          | 189.27 | 189.27 | 189.27 | 170.35 | 160.88 | 170.35 | 160.88 |
|                             |                   | Non-PAT                   | Million Ton          | 280.24 | 280.24 | 280.24 | 252.21 | 238.20 | 252.21 | 238.20 |
| Light Industry <sup>1</sup> |                   | PAT                       |                      | n.a.   |
|                             |                   | Non-PAT                   |                      | n.a.   |
|                             | Brick Production  | BTK                       | Billion Bricks       | 3.75   | 3.75   | 3.75   | 3.00   | 2.81   | 3.00   | 2.81   |



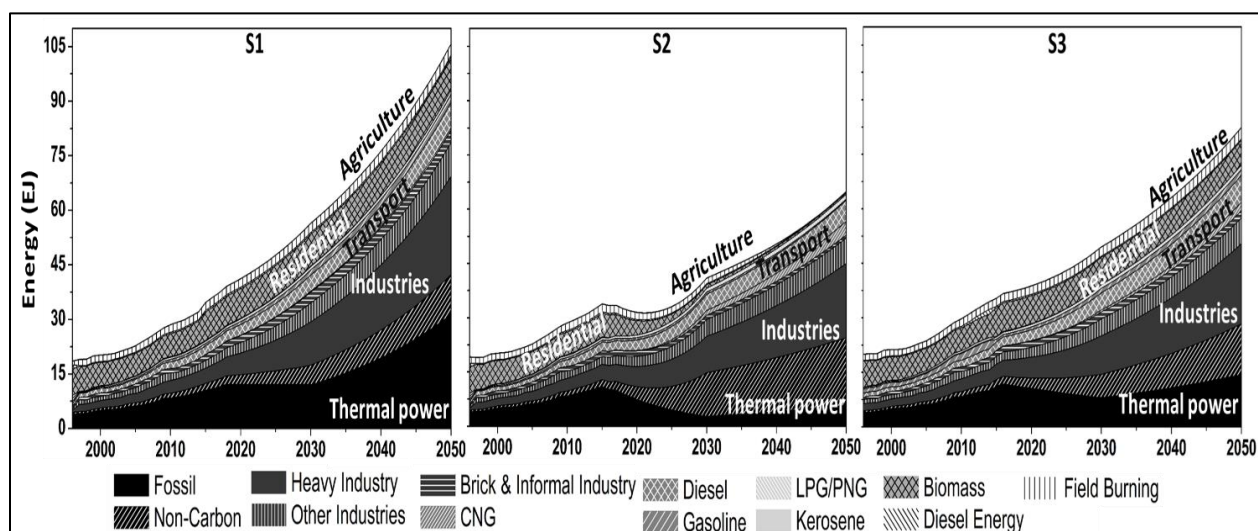

**Figure S3.** Energy Evolution in Scenarios BAU, S2 and S3

Much of the energy demand in S1 is from electricity generation which is majorly fossil fueled, industry (coal and biomass fueled), in residential biomass is dominantly used as fuel. In scenarios S2 and S3 use of energy efficient technologies like Non-carbon fuel use thermal power, PAT implementation in industries and cleaner technologies in brick production, LPG use in residential and energy efficient standards in transport can help to lower the energy demand.

**Table S6.** Energy demand for each technology (EJ/year)

| Sector                 | Source Categories      | TechMix                   | Energy demand (EJ) |       |      |       |       |       |
|------------------------|------------------------|---------------------------|--------------------|-------|------|-------|-------|-------|
|                        |                        |                           | BAU                |       | S2   |       | S3    |       |
|                        |                        |                           | 2030               | 2050  | 2030 | 2050  | 2030  | 2050  |
| Electricity generation | Electricity generation | Non-carbon energy         | 5.35               | 10.92 | 6.42 | 13.92 | 12.04 | 18.56 |
|                        |                        | Sub-critical-coal         | 8.76               | 23.35 | 4.65 | 7.80  | 1.19  | 2.13  |
|                        |                        | Super-critical-coal       | 0.37               | 4.46  | 0.41 | 1.09  | 0.17  | 0.41  |
|                        |                        | Ultra super critical-coal | 0.00               | 2.64  | 0.37 | 0.92  | 0.26  | 0.61  |
|                        |                        | IGCC-coal                 | 0.00               | 1.27  | 0.26 | 0.64  | 0.34  | 1.12  |
|                        |                        | Sub-critical-gas          | 2.78               | 3.34  | 1.94 | 2.97  | 0.50  | 0.81  |
|                        |                        | Super-critical-gas        | 0.12               | 0.64  | 0.17 | 0.42  | 0.07  | 0.16  |
|                        |                        | Ultra super critical-gas  | 0.00               | 0.38  | 0.15 | 0.35  | 0.11  | 0.23  |
|                        |                        | IGCC-gas                  | 0.00               | 0.18  | 0.11 | 0.24  | 0.14  | 0.43  |
| Heavy Industry         | Cement                 | PAT                       | 1.67               | 3.08  | 1.61 | 3.02  | 1.88  | 3.64  |
|                        |                        | Non-PAT                   | 0.66               | 1.22  | 0.49 | 0.63  | 0.21  | 0.00  |
|                        | Iron and steel         | PAT                       | 2.54               | 4.31  | 2.45 | 4.21  | 3.35  | 6.10  |
|                        |                        | Non-PAT                   | 2.50               | 3.91  | 2.04 | 2.57  | 0.80  | 0.00  |
|                        | Fertilizer             | PAT                       | 0.26               | 0.26  | 0.25 | 0.25  | 0.30  | 0.30  |
|                        |                        | Non-PAT                   | 0.09               | 0.09  | 0.07 | 0.05  | 0.02  | 0.00  |
|                        | Non-ferrous            | PAT                       | 2.54               | 8.62  | 2.51 | 8.69  | 2.98  | 10.47 |
| Light Industry         |                        | Non-PAT                   | 1.69               | 5.47  | 1.18 | 2.63  | 0.49  | 0.00  |
|                        |                        | PAT                       | 1.81               | 3.70  | 2.58 | 6.48  | 3.95  | 7.08  |

|                             |                   |                           |              |               |              |              |              |              |
|-----------------------------|-------------------|---------------------------|--------------|---------------|--------------|--------------|--------------|--------------|
|                             |                   | Non-PAT                   | 3.35         | 5.56          | 2.58         | 2.78         | 0.70         | 0.00         |
| Brick and informal industry | Brick Production  | BTK                       | 1.22         | 1.66          | 0.78         | 0.71         | 0.39         | 0.00         |
|                             |                   | Clamps                    | 1.03         | 0.50          | 0.62         | 0.38         | 0.21         | 0.00         |
|                             |                   | Zig-zag firing            | 0.22         | 0.43          | 0.12         | 0.21         | 0.23         | 0.21         |
|                             |                   | Hollow                    | 0.05         | 0.42          | 0.04         | 0.32         | 0.13         | 0.32         |
|                             |                   | Non-fired bricks          | 0.00         | 0.00          | 0.00         | 0.00         | 0.00         | 0.00         |
|                             | Informal industry | Trad. Biofuel             | 0.44         | 0.45          | 0.31         | 0.29         | 0.14         | 0.09         |
|                             |                   | Gasifier                  | 0.03         | 0.09          | 0.05         | 0.09         | 0.15         | 0.21         |
|                             | Passenger Private | Gasoline -BS III          | 0.56         | 0.00          | 0.09         | 0.00         | 0.00         | 0.00         |
|                             |                   | BS IV                     | 0.56         | 0.00          | 0.37         | 0.00         | 0.18         | 0.00         |
|                             |                   | BS V                      | 0.30         | 1.64          | 0.58         | 0.66         | 0.18         | 0.07         |
|                             |                   | BS VI                     | 0.00         | 0.66          | 0.19         | 0.95         | 0.25         | 0.22         |
|                             |                   | CNG                       | 0.13         | 0.51          | 0.20         | 0.82         | 0.24         | 0.35         |
|                             |                   | Electric                  | 0.00         | 0.00          | 0.00         | 0.00         | 0.00         | 0.00         |
|                             | Passenger Public  | Diesel-BS III             | 1.19         | 0.00          | 0.36         | 0.00         | 0.00         | 0.00         |
|                             |                   | BS IV                     | 0.48         | 0.00          | 0.59         | 0.00         | 0.32         | 0.00         |
|                             |                   | BS V                      | 0.36         | 2.10          | 0.83         | 1.26         | 0.96         | 0.79         |
|                             |                   | BS VI                     | 0.00         | 1.47          | 0.59         | 3.15         | 1.28         | 2.99         |
|                             |                   | CNG                       | 0.14         | 0.24          | 0.36         | 1.54         | 1.04         | 3.46         |
|                             |                   | Electric                  | 0.00         | 0.00          | 0.00         | 0.00         | 0.00         | 0.00         |
|                             | Freight           | Diesel (BS-III)           | 1.26         | 0.00          | 1.05         | 0.00         | 0.76         | 0.00         |
|                             |                   | (BS-IV)                   | 0.97         | 0.72          | 0.84         | 0.12         | 0.57         | 0.00         |
|                             |                   | (BS-V)                    | 0.21         | 2.10          | 0.42         | 2.41         | 0.57         | 0.68         |
|                             |                   | (BS-VI)                   | 0.00         | 0.48          | 0.00         | 0.48         | 0.00         | 1.35         |
| Residential                 | Cooking           | Trad. Biofuel             | 7.21         | 7.22          | 5.32         | 3.94         | 0.24         | 0.02         |
|                             |                   | Gasifier                  | 0.21         | 0.39          | 0.92         | 1.58         | 0.50         | 0.24         |
|                             |                   | Kerosene                  | 0.00         | 0.00          | 0.00         | 0.00         | 0.00         | 0.00         |
|                             |                   | LPG                       | 0.92         | 1.11          | 0.97         | 1.22         | 1.06         | 1.42         |
|                             |                   | Electricity               | 0.00         | 0.00          | 0.00         | 0.00         | 0.00         | 0.00         |
|                             | Lighting          | Kerosene                  | 0.10         | 0.09          | 0.03         | 0.02         | 0.00         | 0.00         |
|                             |                   | Electricity and solar     | 0.00         | 0.00          | 0.00         | 0.00         | 0.00         | 0.00         |
|                             | Space heating     | Wood                      | 1.36         | 1.35          | 1.29         | 1.27         | 0.24         | 0.17         |
|                             |                   | Electric & solar          | 0.00         | 0.00          | 0.00         | 0.00         | 0.00         | 0.00         |
|                             | diesel genset     | Diesel                    | 0.21         | 0.21          | 0.20         | 0.20         | 0.17         | 0.14         |
|                             |                   | Electric & solar          | 0.00         | 0.00          | 0.00         | 0.00         | 0.00         | 0.00         |
| Agriculture                 | Agr.res.burn      | Open Residue Burning      | 2.55         | 3.12          | 2.55         | 3.12         | 1.58         | 0.00         |
|                             |                   | Deep sowing mulching tech | 0.00         | 0.00          | 0.00         | 0.00         | 0.00         | 0.00         |
|                             | Agr. Pumps        | Diesel                    | 0.19         | 0.18          | 0.07         | 0.04         | 0.03         | 0.00         |
|                             |                   | Electric & solar          | 0.00         | 0.00          | 0.00         | 0.00         | 0.00         | 0.00         |
|                             | Agr. Tractors     | Diesel                    | 0.25         | 0.30          | 0.25         | 0.30         | 0.22         | 0.23         |
|                             |                   | <b>Total</b>              | <b>56.64</b> | <b>110.84</b> | <b>50.23</b> | <b>84.75</b> | <b>41.14</b> | <b>65.00</b> |

## S2.5. Technology linked emission factors

For thermal power, emission factors (Table S7) assumed a mean 38% ash content coal, typical of India, with electrostatic precipitators (ESP) working at 99.98% while more efficient supercritical, ultra-super critical and IGCC technologies, had emission reductions in proportion with increased energy efficiency. In December 2015, the Indian Ministry of Environment and Forests issued new norms for thermal plants with emission standards for SO<sub>2</sub> and NO<sub>x</sub> (MoEFCC,2015). Reported barriers to quick adoption of desulphurization and de-NO<sub>x</sub> technologies (CSE, 2016), lead to assumptions here of low rates of flue gas desulphurization technology adoption. Preliminary surveys show little progress in the implementation of new standards, mainly due to insufficient knowledge in advanced pollution control technologies and lack of i) space for installation, ii) storage for raw materials and iii) clarity on cost recovery (CSE, 2016). Similarly, in heavy industries like cement, iron and steel, fertilizer and non-ferrous, 90% (S1 and S2) and 100% (S3) operation of existing controls are considered while emission factors for PAT technologies were reduced below non-PAT values using their increase in efficiency (Table S7).

It was assumed that non-fired brick production, which uses cement, involves no use of fuel for firing or drying purposes, hence produces no emissions at the stage of brick production, to avoid double-counting of emissions related to feedstock, which are accounted in cement production. In informal industry, the use of traditional biomass technologies for major thermal and drying operations was assumed shift to cleaner gasifier or LPG technologies, hence, emission factors similar to those for residential cooking were considered. In the residential sector, available measurements (reviewed in Pandey et al. 2014) were used to derive emission factors for wood, dung-cake, crop residue combustion in cook stoves, as also for kerosene and LPG cook stoves, which are also used for biomass fired water-heating and space-heating. Diesel generator sets, for residential use and for mobile towers have been included, whose emission factors are set similar to measured factors for agricultural diesel pumps.

In the agriculture sector, emissions from field burning of cereal straw and sugarcane residue were included. Here, emission factors (Table S7) for cereal and sugarcane burning were used, with zero emissions allocated, in cases of future shifts to deep sowing-mulching technology (Gupta, 2014). The distributed diesel category included diesel use in agricultural tractors and pumps, and in diesel generator sets used for non-grid electricity supply. Emission factors for distributed diesel sources are used, with zero emission allocation for a shift to electric or solar technologies.

**Table S7.** Emission factors of SLCP's, fine particulate matter and CO<sub>2</sub> (g/kg of fuel used)

| Sector         | Source Categories | TechMix              | SO <sub>2</sub> | NO <sub>x</sub> | NM VOC | CH <sub>4</sub> | CO   | PM <sub>2.5</sub> | BC  | OC  | CO <sub>2</sub> |
|----------------|-------------------|----------------------|-----------------|-----------------|--------|-----------------|------|-------------------|-----|-----|-----------------|
| Thermal power  | TPP - coal        | Sub-critical         | 7.3             | 4.5             | 0.0    | 0.0             | 1.5  | 1.8               | 0.0 | 0.0 | 1766.0          |
|                |                   | Super-critical       | 6.5             | 4.0             | 0.0    | 0.0             | 1.3  | 1.6               | 0.0 | 0.0 | 1571.7          |
|                |                   | Ultra super critical | 5.7             | 3.5             | 0.0    | 0.0             | 1.2  | 1.4               | 0.0 | 0.0 | 1377.5          |
|                |                   | IGCC                 | 4.9             | 3.0             | 0.0    | 0.0             | 1.0  | 1.2               | 0.0 | 0.0 | 1183.2          |
|                | TPP - oil & gas   | Sub-critical         | 0.0             | 3.8             | 0.0    | 0.2             | 0.7  | 0.0               | 0.0 | 0.0 | 3120.0          |
|                |                   | Super-critical       | 0.0             | 3.4             | 0.0    | 0.2             | 0.6  | 0.0               | 0.0 | 0.0 | 2776.8          |
|                |                   | Ultra super critical | 0.0             | 2.9             | 0.0    | 0.1             | 0.6  | 0.0               | 0.0 | 0.0 | 2433.6          |
|                |                   | IGCC                 | 0.0             | 2.3             | 0.0    | 0.1             | 0.4  | 0.0               | 0.0 | 0.0 | 1860.5          |
| Heavy Industry | Cement            | PAT                  | 1.2             | 2.1             | 0.1    | 0.0             | 1.5  | 2.3               | 0.0 | 0.1 | 770.0           |
|                |                   | Non-PAT              | 1.2             | 2.1             | 0.1    | 0.0             | 1.5  | 2.4               | 0.0 | 0.1 | 786.0           |
|                | Iron and steel    | PAT                  | 5.2             | 1.9             | 0.4    | 0.1             | 92.7 | 1.2               | 0.3 | 0.2 | 1283.0          |
|                |                   | Non-PAT              | 8.6             | 3.0             | 0.7    | 0.1             | 59.5 | 1.9               | 0.4 | 0.3 | 2004.0          |
|                | Fertilizer        | PAT                  | 2.7             | 1.1             | 3.7    | 0.0             | 7.1  | 0.3               | 0.1 | 0.0 | 1593.0          |
|                |                   | Non-PAT              | 2.7             | 1.1             | 3.8    | 0.0             | 6.9  | 0.3               | 0.1 | 0.0 | 1625.0          |
|                | Non-ferrous       | PAT                  | 2.7             | 1.1             | 3.7    | 0.0             | 0.0  | 0.3               | 0.1 | 0.0 | 1593.0          |
|                |                   | Non-PAT              | 2.7             | 1.1             | 3.8    | 0.0             | 0.0  | 0.3               | 0.1 | 0.0 | 1625.0          |
| Light Industry |                   | PAT                  | 15.6            | 2.9             | 0.0    | 0.1             | 0.6  | 0.0               | 0.0 | 0.0 | 3149.2          |

|                             |                     |                           |      |       |      |     |       |      |      |     |        |
|-----------------------------|---------------------|---------------------------|------|-------|------|-----|-------|------|------|-----|--------|
|                             |                     | Non-PAT                   | 13.5 | 7.0   | 0.6  | 0.1 | 3.6   | 2.4  | 0.5  | 0.1 | 2087.1 |
| Brick and Informal industry | Brick Production    | BTK                       | 9.8  | 3.8   | 0.2  | 0.1 | 40.4  | 3.6  | 3.1  | 0.1 | 1714.1 |
|                             |                     | Clamps                    | 9.8  | 3.8   | 0.2  | 0.1 | 110.5 | 4.2  | 1.6  | 0.6 | 1714.1 |
|                             |                     | Zig-zag firing            | 9.8  | 3.8   | 0.2  | 0.1 | 21.1  | 2.0  | 0.3  | 0.2 | 1714.1 |
|                             |                     | VS BK                     | 9.8  | 3.8   | 0.2  | 0.1 | 72.4  | 2.3  | 0.0  | 1.0 | 1714.1 |
|                             |                     | Non-fired bricks          | 0.0  | 0.0   | 0.0  | 0.0 | 0.0   | 0.0  | 0.0  | 0.0 | 0.0    |
|                             | Informal industry   | Trad. Biofuel             | 0.4  | 0.7   | 11.2 | 5.3 | 70.6  | 5.6  | 0.7  | 2.2 | 13.1   |
|                             |                     | Gasifier                  | 0.3  | 0.7   | 4.3  | 0.9 | 17.7  | 0.8  | 0.1  | 0.3 | 13.1   |
| Transport                   | Passenger - Private | Gasoline BS III           | 0.2  | 32.4  | 98.4 | 6.6 | 537.2 | 4.4  | 0.2  | 3.5 | 2810.3 |
|                             |                     | Gasoline BS IV            | 0.2  | 22.7  | 68.9 | 4.6 | 376.1 | 0.9  | 0.0  | 0.7 | 2810.3 |
|                             |                     | Gasoline BS V             | 0.2  | 13.0  | 68.9 | 4.6 | 214.9 | 0.9  | 0.0  | 0.7 | 2810.3 |
|                             |                     | Gasoline BS VI            | 0.2  | 2.6   | 19.7 | 1.3 | 43.0  | 0.4  | 0.0  | 0.3 | 2810.3 |
|                             |                     | CNG                       | 0.0  | 10.8  | 1.8  | 1.8 | 20.1  | 0.0  | 0.0  | 0.0 | 2781.0 |
|                             |                     | Electric                  | 0.0  | 0.0   | 0.0  | 0.0 | 0.0   | 0.0  | 0.0  | 0.0 | 0.0    |
|                             | Passenger - Public  | DieselBS III              | 0.5  | 39.2  | 6.0  | 0.1 | 31.5  | 6.8  | 1.2  | 0.4 | 2365.9 |
|                             |                     | DieselBS IV               | 0.4  | 27.5  | 4.2  | 0.1 | 22.0  | 1.4  | 0.2  | 0.1 | 2365.9 |
|                             |                     | DieselBS V                | 0.4  | 15.7  | 4.2  | 0.1 | 12.6  | 1.4  | 0.2  | 0.1 | 2365.9 |
|                             |                     | DieselBS VI               | 0.4  | 3.1   | 1.2  | 0.0 | 2.5   | 0.7  | 0.1  | 0.0 | 2365.9 |
|                             |                     | CNG                       | 0.0  | 17.4  | 0.0  | 0.4 | 20.1  | 0.0  | 0.0  | 0.0 | 3884.6 |
|                             |                     | Electric                  | 0.0  | 0.0   | 0.0  | 0.0 | 0.0   | 0.0  | 0.0  | 0.0 | 0.0    |
|                             | Freight             | DieselBS III              | 0.7  | 44.9  | 10.1 | 0.2 | 35.8  | 6.8  | 4.4  | 1.4 | 2590.4 |
|                             |                     | DieselBS IV               | 0.6  | 31.5  | 7.1  | 0.1 | 25.1  | 1.4  | 0.9  | 0.3 | 2590.4 |
|                             |                     | DieselBS V                | 0.6  | 18.0  | 7.1  | 0.1 | 14.3  | 1.4  | 0.9  | 0.3 | 2590.4 |
|                             |                     | DieselBS VI               | 0.6  | 3.6   | 2.0  | 0.0 | 2.9   | 0.7  | 0.4  | 0.1 | 2590.4 |
| Residential                 | Cooking             | Trad. Biofuel             | 0.4  | 0.7   | 11.2 | 5.3 | 70.6  | 5.6  | 0.7  | 2.2 | 13.1   |
|                             |                     | Gasifier                  | 0.3  | 0.7   | 4.3  | 0.9 | 17.7  | 0.8  | 0.1  | 0.3 | 13.1   |
|                             |                     | Kerosene                  | 0.0  | 0.0   | 17.0 | 0.7 | 39.9  | 0.6  | 0.2  | 0.3 | 2985.0 |
|                             |                     | LPG                       | 0.3  | 0.0   | 18.8 | 0.1 | 14.9  | 0.3  | 0.0  | 0.1 | 3085.0 |
|                             |                     | Electricity               | 0.0  | 0.0   | 0.0  | 0.0 | 0.0   | 0.0  | 0.0  | 0.0 | 0.0    |
|                             | Lighting            | Kerosene                  | 0.0  | 0.0   | 0.0  | 0.0 | 11.0  | 93.0 | 90.0 | 0.4 | 2770.0 |
|                             |                     | Electricity and solar     | 0.0  | 0.0   | 0.0  | 0.0 | 0.0   | 0.0  | 0.0  | 0.0 | 0.0    |
|                             | Space heating       | Wood                      | 0.1  | 0.0   | 6.9  | 4.9 | 76.4  | 4.1  | 0.7  | 1.9 | 135.8  |
|                             |                     | Electric & solar          | 0.0  | 0.0   | 0.0  | 0.0 | 0.0   | 0.0  | 0.0  | 0.0 | 0.0    |
|                             | Diesel genset       | Diesel                    | 0.7  | 97.2  | 7.7  | 0.1 | 20.9  | 6.9  | 4.6  | 1.5 | 3186.1 |
|                             |                     | Electric & solar          | 0.0  | 0.0   | 0.0  | 0.0 | 0.0   | 0.0  | 0.0  | 0.0 | 0.0    |
| Agriculture                 | Agr.res.burn        | Open Residue Burning      | 0.5  | 2.9   | 13.4 | 3.1 | 83.8  | 6.1  | 0.6  | 2.2 | 0.0    |
|                             |                     | Deep sowing mulching tech | 0.0  | 0.0   | 0.0  | 0.0 | 0.0   | 0.0  | 0.0  | 0.0 | 0.0    |
|                             | Agr. Pumps          | Diesel                    | 0.7  | 97.2  | 7.7  | 0.1 | 20.9  | 6.9  | 4.6  | 1.5 | 3186.1 |
|                             |                     | Electric & solar          | 0.0  | 0.0   | 0.0  | 0.0 | 0.0   | 0.0  | 0.0  | 0.0 | 0.0    |
|                             | Agr. Tractors       | Diesel                    | 0.7  | 126.0 | 1.1  | 0.0 | 3.6   | 17.0 | 11.0 | 4.0 | 3186.0 |

## S2.6. Evaluation of future emissions

### Evaluation with ECLIPSE V5a and GAINS-WEO2016

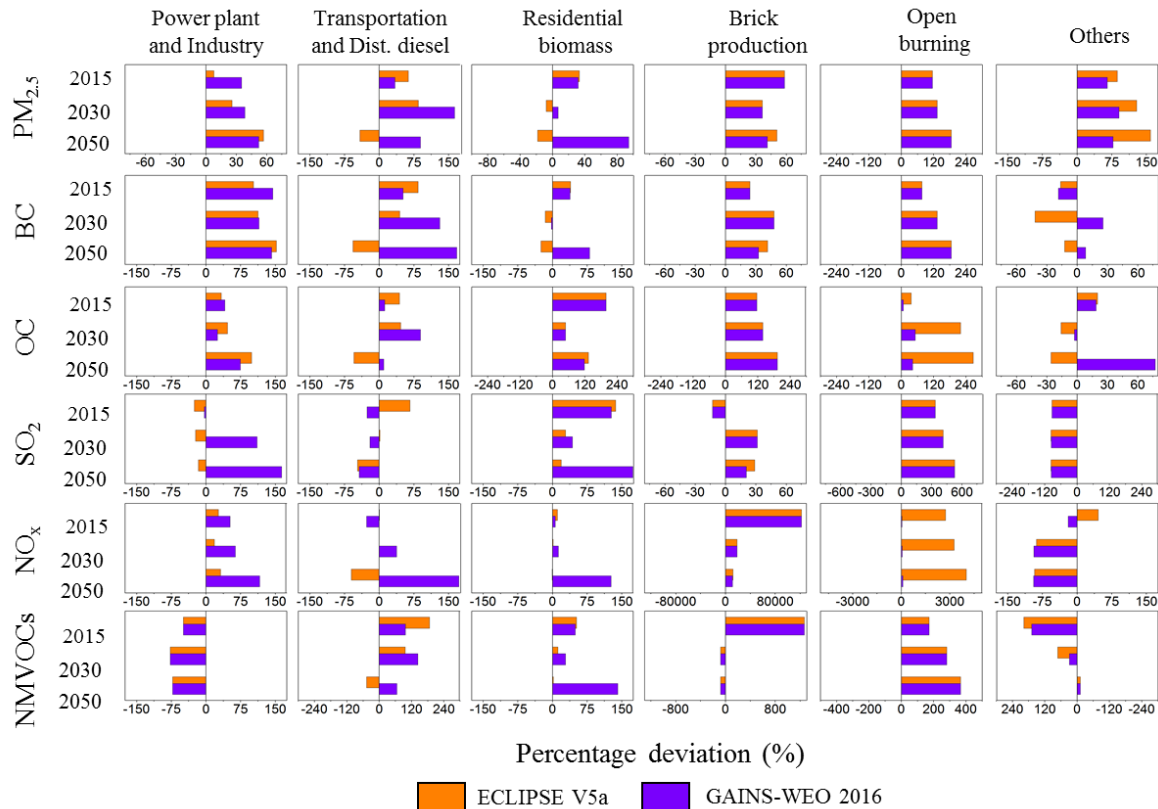

**Figure S4.** Percentage deviation in emissions of ECLIPSE V5a and GAINS-WEO2016 from emissions of this study by sector.

(Percentage deviation is calculated as  $(\text{IITB S2} - \text{ECLIPSE V5a}) / \text{ECLIPSE V5a}$  and  $(\text{IITB S2} - \text{GAINS WEO2016}) / \text{GAINS WEO2016}$ ).

### Evaluation with RCP scenarios

RCP2.6 assumes net negative CO<sub>2</sub> emissions after around 2070. RCP4.5 and RCP6.0 aim for a smooth stabilization of concentrations by 2150 and RCP8.5 stabilizes concentrations only by 2250. However, RCP scenarios are not tied to any specific socio-economic and technology evolution pathway, making difficult any direct comparison of underlying assumptions, while permitting a comparison of gross emission magnitudes.

Estimated Indian emissions from the RCP scenarios, of SO<sub>2</sub>, NO<sub>x</sub>, and NMVOCs, and for BC and OC, for 2005-2050 at 50×50 km resolution, were used for the evaluation. (<http://tntcat.iiasa.ac.at/RcpDb/dsd?Action=htmlpage&page=download>). The sectors used corresponding to ones in this study, included Energy (Power Plants, Energy Conversion, Extraction, and Distribution), Domestic (Residential and Commercial), Industry (combustion & processing), Surface Transportation and Agriculture waste burning in fields. Gridded emissions in kg m<sup>-2</sup> s<sup>-1</sup> are summed over the Indian landmass and converted to million tonnes y<sup>-1</sup> (Table S8). The present estimates do not include emissions from soils



and animal rearing or from shipping and aviation, rather they focus on energy use and solvent based activities. Therefore, corresponding sectors in the RCP database were excluded from the evaluation.

Across RCP scenarios, SO<sub>2</sub> emissions from India are well bounded: 4–9.5 MT/yr in 2030 and 3–7.5 MT/yr in 2050. Emissions of SO<sub>2</sub> estimated here for the highest-control scenario, S3, agreed with those from RCP 4.5 in 2030 and RCP 8.5 in 2050, due to similar assumptions of over 80% non-coal electricity generation. However, the S2 and BAU scenarios estimated much larger emissions, respectively, exceeding RCP8.5 by 1.5 to 2 times in 2030 and 3 to 5 times in 2050. This results from our assumption of low levels (max 25%) of deployment of flue gas desulphurization, as only four coal-fired TPPs in India operate flue gas desulphurization (FGD) units and among those to be commissioned through 2030, only 7 TPPs are listed to have FGD (CAT and Urban Emissions, 2014, Prayas Energy Group, 2011), which differs from assumptions of greater SO<sub>2</sub> emission control in the RCP scenarios. These assumptions would reflect in higher secondary sulphate contribution to PM<sub>2.5</sub> concentrations from thermal and total coal sectors under the BAU and S2 scenarios, in 2030 and 2050.

For NO<sub>x</sub> emissions as well, there is similar agreement of the S3 scenario here with RCP4.5 in both 2030 and 2050, but significantly larger emissions estimated in the S2 and BAU scenarios. The emissions shares are dominated by thermal power and transport sector and grow with sectoral growth under the first two scenarios. Under the S3 scenario, shifts to tighter emission standards for vehicles and a greater share of CNG in public transport, and to non-fossil power generation, reduce NO<sub>x</sub> emissions. A non-negligible ~20% share is from residential, agricultural field burning and brick production sectors, which is reduced in magnitude by the adoption of mitigation based largely on cleaner combustion technologies. Similar to emissions of SO<sub>2</sub>, those of NO<sub>x</sub> in S1 and S2 grow well beyond magnitudes in the RCP database for future years, while those in S3 agree with RCP emission magnitudes, consistent with differences in assumptions in the thermal power sector.

For NMVOC, there is close agreement of S3 scenario emissions with those of RCP6.0 and of S2 scenario emissions lying between those of RCP4.5 and RCP8.5, both in 2030 and 2050. The BAU scenario, which assumes negligible shifts away from residential biomass fuel use and agricultural field burning, calculates somewhat larger NMVOC emissions. Present day NMVOC emissions are dominated by residential energy use, largely from traditional biomass fuel stoves, followed by fugitive emissions from energy extraction (coal mining and oil exploration), and open burning of agricultural residues in fields.

Emissions of BC in the S3 scenario agreed best with RCP6.0 in 2030 and RCP8.5 in 2050, while BAU and S2 scenario BC emissions exceeded those of the RCP8.5 by factors of 1.5 to 3, from inclusion of new sources like residential lighting (with kerosene wick lamps) and water and space heating (with biomass fuels). Emissions of OC in the S2 scenario closely matched those in RCP4.5, while those in BAU matched RCP8.5, in both 2030 and 2050; however, those in S3 were a factor of 3 lower than the lowest RCP6.0 emissions.

**Table S8.** Representative Concentration Pathways (RCP) scenarios values over India

| Scenario | Years | Emissions in MTy <sup>-1</sup> |     |     |                 |                 |       |
|----------|-------|--------------------------------|-----|-----|-----------------|-----------------|-------|
|          |       | PM <sub>2.5</sub>              | BC  | OC  | SO <sub>2</sub> | NO <sub>x</sub> | NMVOC |
|          |       |                                |     |     |                 |                 |       |
| BAU      | 2020  | 9.8                            | 1.4 | 2.4 | 10.3            | 11.5            | 15.0  |
|          | 2030  | 12.0                           | 1.6 | 2.6 | 17.8            | 18.2            | 14.8  |
|          | 2040  | 14.5                           | 1.6 | 2.7 | 26.8            | 23.3            | 15.5  |
|          | 2050  | 18.5                           | 1.6 | 2.9 | 41.4            | 31.7            | 16.3  |
|          |       |                                |     |     |                 |                 |       |
| S2       | 2020  | 9.1                            | 1.2 | 2.2 | 9.4             | 10.5            | 14.1  |
|          | 2030  | 9.5                            | 1.1 | 2.2 | 12.7            | 13.7            | 12.5  |
|          | 2040  | 10.3                           | 1.1 | 2.2 | 16.2            | 15.7            | 12.4  |
|          | 2050  | 11.6                           | 1.0 | 2.2 | 20.7            | 18.4            | 12.4  |
|          |       |                                |     |     |                 |                 |       |
| S3       | 2020  | 6.0                            | 0.9 | 1.4 | 6.4             | 8.6             | 9.9   |
|          | 2030  | 3.8                            | 0.5 | 1.0 | 6.0             | 8.6             | 5.8   |
|          | 2040  | 3.0                            | 0.3 | 0.7 | 6.6             | 9.2             | 4.0   |
|          | 2050  | 3.0                            | 0.3 | 0.7 | 7.5             | 10.5            | 3.8   |
|          |       |                                |     |     |                 |                 |       |
| RCP 2.6  | 2020  |                                | 0.6 | 1.9 | 8.2             | 4.4             | 9.9   |
|          | 2030  |                                | 0.5 | 1.9 | 7.1             | 4.5             | 10.3  |
|          | 2040  |                                | 0.4 | 1.8 | 4.8             | 4.8             | 10.3  |
|          | 2050  |                                | 0.4 | 1.5 | 4.0             | 5.4             | 8.5   |
|          |       |                                |     |     |                 |                 |       |
| RCP 4.5  | 2020  |                                | 0.6 | 1.7 | 7.9             | 4.8             | 12.4  |
|          | 2030  |                                | 0.7 | 1.8 | 8.8             | 6.0             | 14.3  |
|          | 2040  |                                | 0.7 | 1.8 | 8.4             | 6.5             | 15.8  |
|          | 2050  |                                | 0.7 | 1.6 | 6.8             | 6.3             | 16.8  |
|          |       |                                |     |     |                 |                 |       |
| RCP 6.0  | 2020  |                                | 0.4 | 1.3 | 5.4             | 3.1             | 6.7   |
|          | 2030  |                                | 0.4 | 1.3 | 4.1             | 2.7             | 6.1   |
|          | 2040  |                                | 0.4 | 1.3 | 5.3             | 3.1             | 5.9   |
|          | 2050  |                                | 0.4 | 1.3 | 5.4             | 3.3             | 5.9   |
|          |       |                                |     |     |                 |                 |       |
| RCP 8.5  | 2020  |                                | 0.6 | 2.0 | 8.5             | 5.6             | 11.0  |
|          | 2030  |                                | 0.6 | 2.1 | 8.8             | 6.2             | 12.5  |
|          | 2040  |                                | 0.7 | 2.3 | 9.2             | 6.1             | 14.1  |
|          | 2050  |                                | 0.7 | 2.5 | 7.6             | 4.9             | 13.2  |

## References

- Anandarajah, G. and Gambhir, A.: India's CO<sub>2</sub> Emission Pathways to 2050: What Role Can Renewables Play? *Applied Energy*, 131, 79–86, <http://dx.doi.org/10.1016/j.apenergy.2014.06.026>, 2014
- Auto Fuel Vision and Policy 2025. Report of the Expert Committee: Auto Fuel Vision and Policy 2025. Government of India, <http://petroleum.nic.in/docs/reports/autopol.pdf>, 2014.
- CAT and Urban Emissions: Coal Kills: Health Impacts of Air Pollution from India's Coal Power Expansion, Conservation Action Trust (CAT), Mumbai. <http://www.indiaairquality.info/wp-content/uploads/docs/Air%20Pollution%20from%20India%20Coal%20TPPs%20-%20LowRes.pdf>, 2014.
- CSE: New Environmental Norms for the Power Sector. Proceedings and Recommendations of the Stakeholder Workshop Organized by CSE, Centre for Science and Environment, New Delhi. <http://cseindia.org/userfiles/new-environmental-norms-report.pdf>, 2016.
- Firoz, A. S.: Long Term Perspectives for Indian Steel Industry, Ministry of Steel, Economic Research Unit mimeo, New Delhi, May, 2014.
- Gupta, R.: Essays on Air Pollution, Global Warming and Agricultural Productivity. PhD Dissertation, Indian Statistical Institute, New Delhi, 2014.
- Guttikunda, S.K., Mohan, D.: Re-fueling road transport for better air quality in India, *Energy Policy* 68, 556-561, 2014.
- ICRA: Indian Automobile Industry: Proposed BS-VI Emission Standards. ICRA Limited, New Delhi, <http://www.icra.in/Files/ticker/SH-2016-Q2-6-ICRA-Passenger%20vehicles.pdf>, 2016.
- IEA (International Energy Agency), (2009). Cement Technology Roadmap. Report by International Energy Agency and World Business Council for Sustainable Development. Pages- 36, <https://www.iea.org/publications/freepublications/publication/Cement.pdf>. Last accessed 1/April/2016.
- IEP: Integrated Energy Policy: Report of the Expert Committee. New Delhi, India. Government of India Planning Commission. Available: [http://planningcommission.nic.in/reports/genrep/rep\\_intengy.pdf](http://planningcommission.nic.in/reports/genrep/rep_intengy.pdf), accessed: 14 August 2017, 2006.
- IESS, NITI Aayog: India Energy Security Scenarios, 2047, NITI Aayog, Govt of India, Available: <http://iess2047.gov.in/>, accessed: 1 April 2015, 2015.
- Lam, N.L., Chen, Y., Weyant, C., Venkataraman, C., Sadavarte, P., Johnson, M.A., Smith, K.R., Brem, B.T., Arineitwe, J., Ellis, J.E., Bond, T.C., Household light makes global heat: high black carbon emissions from kerosene wick lamps, *Environ. Sci. Technol*, 46, 13531-13538, 2012.
- Maithel, S., Uma, R., Bond, T., Baum, E., Thao, V.T.K., (2012). Brick Kilns Performance Assessment, Emissions Measurements, & A Roadmap for Cleaner Brick Production in India Study report prepared by Green Knowledge Solutions, New Delhi, India. [http://www.unep.org/ccac/Portals/50162/docs/Brick\\_Kilns\\_Performance\\_Assessment.pdf](http://www.unep.org/ccac/Portals/50162/docs/Brick_Kilns_Performance_Assessment.pdf). Last accessed: 1/April/2016.
- Murthy, K.S.S.: Indian Aluminium Demand to Grow 5 Times by 2030 by Prof. K.S.S. Murthy, Gen. Secretary, Aluminium Association of India, 2014.

MoEFCC: <http://pib.nic.in/newsite/PrintRelease.aspx?relid=133726>. Press Release. Ministry of Environment, Forest and Climate Change. Government of India, 2015.

MoP: PAT Perform, Achieve and Trade. Ministry of Power, Government of India, 2012.

MoP: Energy Efficient Norms for Power Plants. Press Information Bureau. Ministry of Power. Government of India. Available: <http://pib.nic.in/newsite/PrintRelease.aspx?relid=117384>, accessed 11 August 2017, 2015.

MoRTH: <http://pib.nic.in/newsite/PrintRelease.aspx?relid=134232>. Press Release. Ministry of Road Transport and Highways. Government of India, 2016.

National Solar Mission, Ministry of New and Renewable Energy, Govt. of India <http://www.mnre.gov.in/solar-mission/jnnsn/introduction-2/>, 2010.

NITI Aayog: India Energy Security Scenarios (IESS) 2047. New Delhi: NITI Aayog weblink: <http://indiaenergy.gov.in/>, 2015

NTDPC: Moving India to 2032, India transport report, Government of India, National Transport Development Policy Committee, India, New Delhi, [http://planningcommission.nic.in/reports/genrep/NTDPC\\_Vol\\_01.pdf](http://planningcommission.nic.in/reports/genrep/NTDPC_Vol_01.pdf), accessed: 1 April 2016, 2013.

Pandey, A. and Venkataraman, C.: Estimating emissions from the Indian transport sector with on-road fleet composition and traffic volume. Atmospheric Environment 98: 123-133. <http://dx.doi.org/10.1016/j.atmosenv.2014.08.039>. 2014.

PNGRB: Vision 2030, Natural Gas Infrastructure in India. Report by Industry Group for Petroleum & Natural Gas Regulatory Board, India, 2013.

Prayas Energy Group: Thermal Power Plants on the anvil: Implications and Need for Rationalisation. Pune, India, 2011.

Ray, D.K., Mueller, N.D., West, P.C. and Foley, J.A.: Yield trends are insufficient to double global crop production by 2050. PloS one, 8(6), p.e66428, 2013.

Shukla, P. R., Agarwal, P., Bazaz, A. B., Agarwal, N., Kainuma, M., Masui, T., Fujino, J., Matsuuoka, Y., Hibino, G., Ehara, T.: Low Carbon Society Vision 2050 India, Indian Institute of Management Ahmedabad, National Institute for Environmental Studies, Kyoto University, Mizuho Information & Research Institute, 1–28, [http://2050.nies.go.jp/report/file/lcs\\_asia/indialcs.pdf](http://2050.nies.go.jp/report/file/lcs_asia/indialcs.pdf), 2009.

Shukla, P. R. and Chaturvedi, V.: Low Carbon and Clean Energy Scenarios for India: Analysis of Targets Approach. Energy Economics 34(SUPPL. 3): S487–95. <http://dx.doi.org/10.1016/j.eneco.2012.05.002>, 2012.

UNDP: Energy Efficiency Improvements in the Indian Brick Industry. Available: [www.resourceefficientbricks.org/](http://www.resourceefficientbricks.org/), United Nations Development Programme, 2009.

Venkataraman, C., Habib, G., Kadamba, D., Shrivastava, M., Leon, J.F., Crouzille, B., Boucher, O. and Streets, D.G.: Emissions from open biomass burning in India: Integrating the inventory approach with high-resolution Moderate Resolution Imaging Spectroradiometer (MODIS) active-fire and land cover data. Global biogeochemical cycles, 20(2), 2006.

Venkataraman, C., Sagar, A.D., Habib, G., Lam, N. and Smith, K.R.: The Indian national initiative for advanced biomass cookstoves: the benefits of clean combustion. *Energy for Sustainable Development*, 14(2), pp.63-72, 2010.
